# Supplementary material for: Polymorphisms in intron 1 of HLA-DRA differentially associate with type 1 diabetes and celiac disease and implicate involvement of complement system genes C4A and C4B
Source: eLife. 2026 Feb 2;12:RP89068. doi: 10.7554/eLife.89068 (PMC12863718; doi:10.7554/eLife.89068)
Supplement: Supplementary file 1. [file elife-89068-supp1.xlsx]

## Sheet: Table A
Table A: Cox PH model output for T1D outcome using all samples.
Key:	log(HR): log2 of Hazard Ratio, HR: Hazard Ratio, SE(log(HR)): Standard Error, log(HR) lower 95%: Lower confidence interval for log(HR), log(HR) upper 95%: Upper confidence interval for log(HR), HR lower 95%: Lower confidence interval for HR, HR upper 95%: Upper confidence interval for HR, z: z-score of log(HR), p: p-value
covariate	log(HR)	HR	SE(log(HR))	log(HR) lower 95%	log(HR) upper 95%	HR lower 95%	HR upper 95%	z	p	-log2(p)
tri-SNP 101	-0.607757	0.544571	0.14049	-0.883112	-0.332402	0.413494	0.717199	-4.32598	1.51853e-05	16.007
FDR-T1D	1.13352	3.10659	0.126733	0.885133	1.38192	2.42331	3.98252	8.94423	3.74567e-19	61.2114
rs73043122 (RNASET2/MIR3939)	0.852522	2.34556	0.232134	0.397547	1.3075	1.48817	3.69691	3.67254	0.000240154	12.0238
rs113306148 (PLEKHA1/MIR3941)	0.72994	2.07496	0.219372	0.299978	1.1599	1.34983	3.18962	3.32741	0.000876587	10.1558
rs428595 (PPIL2)	0.927617	2.52848	0.115001	0.70222	1.15301	2.01823	3.16773	8.06619	7.25286e-16	50.2923
rs1004446 (INS)	-0.33218	0.717358	0.0787203	-0.486469	-0.177892	0.614793	0.837033	-4.21976	2.44565e-05	15.3194
rs2476601 (PTPN22)	0.46353	1.58968	0.0899195	0.287291	0.639769	1.33281	1.89604	5.15494	2.53707e-07	21.9103
rs2292239 (ERBB3)	0.199685	1.22102	0.0733336	0.0559534	0.343416	1.05755	1.40975	2.72296	0.00646996	7.27203
Male	0.144651	1.15564	0.101266	-0.0538271	0.343129	0.947596	1.40935	1.42842	0.15317	2.70679
AMR	-0.14256	0.867135	0.199541	-0.533653	0.248532	0.586459	1.28214	-0.714442	0.474954	1.07414
AFR	-0.496685	0.608545	0.73925	-1.94559	0.952218	0.142903	2.59145	-0.671877	0.501662	0.995212
DR3/DR3	0.532395	1.70301	0.330129	-0.114646	1.17944	0.891682	3.25254	1.61269	0.106812	3.22685
DR3/DR4	1.16223	3.19704	0.196215	0.777652	1.5468	2.17636	4.69642	5.92322	3.15695e-09	28.2388
DR4/DR4	0.229167	1.25755	0.186832	-0.137017	0.595352	0.871955	1.81367	1.22659	0.219976	2.18458
DR1/DR4	-0.157547	0.854236	0.326673	-0.797814	0.48272	0.450312	1.62048	-0.482278	0.629608	0.667474
DR4/DR13	0.151952	1.1641	0.443848	-0.717975	1.02188	0.487739	2.77841	0.342351	0.732087	0.449913
SWE	-0.114429	0.891875	0.131266	-0.371706	0.142848	0.689557	1.15355	-0.871736	0.383353	1.38326
FIN	0.289988	1.33641	0.138768	0.018009	0.561968	1.01817	1.75412	2.08974	0.036641	4.7704
GER	0.146954	1.1583	0.194182	-0.233636	0.527545	0.79165	1.69477	0.756785	0.449178	1.15464

## Sheet: Table B
Table B: Cox PH model output for T1D outcome using DR3 homozygote individuals.
Key:	log(HR): log2 of Hazard Ratio, HR: Hazard Ratio, SE(log(HR)): Standard Error, log(HR) lower 95%: Lower confidence interval for log(HR), log(HR) upper 95%: Upper confidence interval for log(HR), HR lower 95%: Lower confidence interval for HR, HR upper 95%: Upper confidence interval for HR, z: z-score of log(HR), p: p-value
covariate	log(HR)	HR	SE(log(HR))	log(HR) lower 95%	log(HR) upper 95%	HR lower 95%	HR upper 95%	z	p	-log2(p)
tri-SNP 101	-1.04674	0.35108	0.237699	-1.51262	-0.580859	0.220331	0.559418	-4.40363	1.06453e-05	16.5194
FDR-T1D	1.05014	2.85804	0.432282	0.20288	1.89739	1.22493	6.66848	2.42929	0.0151285	6.04658
rs73043122 (RNASET2/MIR3939)	0.339028	1.40358	1.0012	-1.62329	2.30135	0.197248	9.98764	0.338621	0.734895	0.44439
rs113306148 (PLEKHA1/MIR3941)	0.757885	2.13376	0.733175	-0.679111	2.19488	0.507068	8.97893	1.0337	0.301275	1.73085
rs428595 (PPIL2)	0.281027	1.32449	0.869079	-1.42234	1.98439	0.24115	7.27461	0.323362	0.746421	0.421938
rs1004446 (INS)	-0.535027	0.585654	0.279612	-1.08306	0.0130026	0.338559	1.01309	-1.91346	0.055689	4.16646
rs2476601 (PTPN22)	0.919859	2.50894	0.304644	0.322768	1.51695	1.38094	4.5583	3.01946	0.00253229	8.62534
rs2292239 (ERBB3)	0.247975	1.28143	0.26478	-0.270983	0.766934	0.762629	2.15315	0.936535	0.348998	1.51871
Male	0.0355249	1.03616	0.352871	-0.656089	0.727139	0.518877	2.06915	0.100674	0.919809	0.120593
AMR	-0.858111	0.423962	0.986609	-2.79183	1.07561	0.0613089	2.93177	-0.869757	0.384433	1.3792
AFR	-0.323454	0.723646	1.17605	-2.62847	1.98156	0.0721889	7.25406	-0.275034	0.78329	0.352381
SWE	0.204601	1.22703	0.402064	-0.58343	0.992631	0.557981	2.69832	0.508876	0.610839	0.711136
FIN	0.249947	1.28396	0.526006	-0.781006	1.2809	0.457945	3.59988	0.475179	0.634659	0.655945
GER	0.298474	1.3478	0.633669	-0.943494	1.54044	0.389265	4.66665	0.471025	0.637623	0.649225

## Sheet: Table C
Table C: Cox PH model output for IA outcome using all samples.
Key:	log(HR): log2 of Hazard Ratio, HR: Hazard Ratio, SE(log(HR)): Standard Error, log(HR) lower 95%: Lower confidence interval for log(HR), log(HR) upper 95%: Upper confidence interval for log(HR), HR lower 95%: Lower confidence interval for HR, HR upper 95%: Upper confidence interval for HR, z: z-score of log(HR), p: p-value
covariate	log(HR)	HR	SE(log(HR))	log(HR) lower 95%	log(HR) upper 95%	HR lower 95%	HR upper 95%	z	p	-log2(p)
tri-SNP 101	-0.342672	0.709871	0.104729	-0.547937	-0.137408	0.578141	0.871615	-3.272	0.00106791	9.871
FDR-T1D	0.770282	2.16038	0.0986399	0.576952	0.963613	1.7806	2.62115	7.80903	5.76283e-15	47.3021
rs428595 (PPIL2)	0.691005	1.99572	0.103199	0.488738	0.893272	1.63026	2.44311	6.69583	2.14458e-11	35.4405
rs1004446 (INS)	-0.179445	0.835734	0.0515324	-0.280447	-0.0784434	0.755446	0.924554	-3.48218	0.00049735	10.9735
rs2476601 (PTPN22)	0.323424	1.38185	0.0655588	0.194931	0.451917	1.21523	1.57132	4.93334	8.08345e-07	20.2385
rs2292239 (ERBB3)	0.172657	1.18846	0.0492996	0.0760313	0.269282	1.079	1.30902	3.50219	0.000461445	11.0816
rs3184504 (SH2B3)	0.235902	1.26605	0.0494746	0.138933	0.33287	1.14905	1.39497	4.76814	1.85933e-06	19.0368
rs9934817 (RBFOX1)	0.377082	1.45802	0.159007	0.065434	0.688729	1.06762	1.99118	2.37148	0.017717	5.81873
rs11705721 (PXK/PDHB)	0.161407	1.17516	0.0505942	0.0622446	0.26057	1.06422	1.29767	3.19024	0.00142156	9.4583
Male	0.171665	1.18728	0.0692084	0.0360193	0.307311	1.03668	1.35976	2.48041	0.0131231	6.25175
AMR	-0.0675354	0.934695	0.145368	-0.35245	0.21738	0.702963	1.24282	-0.464584	0.64223	0.638839
AFR	0.10316	1.10867	0.418601	-0.717282	0.923602	0.488077	2.51834	0.246439	0.805342	0.312326
DR3/DR3	0.288146	1.33395	0.220138	-0.143317	0.71961	0.866479	2.05363	1.30893	0.190557	2.3917
DR3/DR4	0.606294	1.83362	0.134881	0.341933	0.870655	1.40767	2.38848	4.49505	6.95545e-06	17.1334
DR4/DR4	0.0385983	1.03935	0.119971	-0.19654	0.273736	0.821569	1.31487	0.321731	0.747656	0.419553
DR1/DR4	-0.609639	0.543547	0.268988	-1.13685	-0.0824319	0.320829	0.920874	-2.26642	0.0234259	5.41575
DR4/DR13	-0.0434109	0.957518	0.348301	-0.726068	0.639246	0.483808	1.89505	-0.124636	0.900812	0.150703
SWE	0.224856	1.25214	0.0860473	0.0562067	0.393506	1.05782	1.48217	2.61317	0.00897064	6.80057
FIN	0.296026	1.34451	0.0966984	0.106501	0.485551	1.11238	1.62507	3.06133	0.00220353	8.82597
GER	-0.0145887	0.985517	0.153475	-0.315395	0.286218	0.729501	1.33138	-0.0950556	0.924271	0.113613

## Sheet: Table D
Table D: Cox PH model output for IA outcome using DR3 homozygote individuals.
Key:	log(HR): log2 of Hazard Ratio, HR: Hazard Ratio, SE(log(HR)): Standard Error, log(HR) lower 95%: Lower confidence interval for log(HR), log(HR) upper 95%: Upper confidence interval for log(HR), HR lower 95%: Lower confidence interval for HR, HR upper 95%: Upper confidence interval for HR, z: z-score of log(HR), p: p-value
covariate	log(HR)	HR	SE(log(HR))	log(HR) lower 95%	log(HR) upper 95%	HR lower 95%	HR upper 95%	z	p	-log2(p)
tri-SNP 101	-0.54127	0.582008	0.165051	-0.864764	-0.217777	0.421151	0.804305	-3.27942	0.00104022	9.90889
FDR-T1D	0.884063	2.42072	0.246617	0.400702	1.36742	1.49287	3.92523	3.58476	0.000337389	11.5333
rs428595 (PPIL2)	-0.0915882	0.912481	0.504057	-1.07952	0.896344	0.339758	2.45063	-0.181702	0.855816	0.224627
rs1004446 (INS)	-0.233295	0.79192	0.142966	-0.513502	0.0469131	0.598396	1.04803	-1.63182	0.102717	3.28325
rs2476601 (PTPN22)	0.362802	1.43735	0.191827	-0.013172	0.738775	0.986914	2.09337	1.8913	0.0585846	4.09334
rs2292239 (ERBB3)	0.315533	1.37099	0.13121	0.0583666	0.572699	1.0601	1.77305	2.4048	0.0161814	5.94952
rs3184504 (SH2B3)	0.23589	1.26604	0.127345	-0.0137004	0.485481	0.986393	1.62496	1.85238	0.0639714	3.96643
rs9934817 (RBFOX1)	0.187632	1.20639	0.473205	-0.739833	1.1151	0.477193	3.04986	0.396512	0.691727	0.531725
rs11705721 (PXK/PDHB)	0.2931	1.34058	0.131665	0.0350427	0.551158	1.03566	1.73526	2.22612	0.0260065	5.26499
Male	-0.0150798	0.985033	0.186035	-0.379702	0.349542	0.684065	1.41842	-0.0810587	0.935395	0.096352
AMR	-0.329033	0.719619	0.465365	-1.24113	0.583066	0.289057	1.79152	-0.707043	0.47954	1.06028
AFR	-0.24961	0.779105	0.78832	-1.79469	1.29547	0.166179	3.65271	-0.316636	0.75152	0.412116
SWE	0.162332	1.17625	0.20698	-0.243341	0.568005	0.784004	1.76474	0.784289	0.43287	1.20799
FIN	-0.214749	0.806744	0.316358	-0.8348	0.405302	0.433961	1.49976	-0.678816	0.497254	1.00794
GER	-0.0884408	0.915357	0.400884	-0.874158	0.697277	0.417213	2.00828	-0.220614	0.825393	0.276848

## Sheet: Table E
Table E: Cox PH model output for GADA-first outcome using all samples.
Key:	log(HR): log2 of Hazard Ratio, HR: Hazard Ratio, SE(log(HR)): Standard Error, log(HR) lower 95%: Lower confidence interval for log(HR), log(HR) upper 95%: Upper confidence interval for log(HR), HR lower 95%: Lower confidence interval for HR, HR upper 95%: Upper confidence interval for HR, z: z-score of log(HR), p: p-value
covariate	coef	exp(coef)	se(coef)	coef lower 95%	coef upper 95%	exp(coef) lower 95%	exp(coef) upper 95%	z	p	-log2(p)
tri-SNP 101	-0.143253	0.866535	0.151398	-0.439989	0.153483	0.644044	1.16589	-0.946198	0.344048	1.53932
FDR-T1D	0.786226	2.1951	0.147216	0.497687	1.07476	1.64491	2.9293	5.34061	9.26324e-08	23.3639
rs428595 (PPIL2)	0.616199	1.85188	0.185105	0.253399	0.978999	1.2884	2.66179	3.32891	0.000871869	10.1636
rs1004446 (INS)	-0.0795773	0.923507	0.0742414	-0.225088	0.0659332	0.798446	1.06816	-1.07187	0.283778	1.81717
rs2476601 (PTPN22)	0.313988	1.36887	0.100188	0.117624	0.510353	1.12482	1.66588	3.134	0.00172441	9.17968
rs2292239 (ERBB3)	0.183442	1.20135	0.0743769	0.0376661	0.329218	1.03838	1.38988	2.46639	0.0136484	6.19512
rs3184504 (SH2B3)	0.278857	1.32162	0.0739101	0.133996	0.423718	1.14339	1.52763	3.77292	0.000161348	12.5975
rs9934817 (RBFOX1)	0.713801	2.04174	0.205563	0.310904	1.1167	1.36466	3.05475	3.47242	0.000515797	10.9209
rs11705721 (PXK/PDHB)	0.121987	1.12974	0.0771764	-0.0292762	0.27325	0.971148	1.31423	1.58062	0.113964	3.13335
Male	0.12333	1.13126	0.103929	-0.0803682	0.327027	0.922777	1.38684	1.18667	0.235359	2.08707
AMR	-0.0337165	0.966846	0.216683	-0.458407	0.390974	0.63229	1.47842	-0.155603	0.876346	0.190427
AFR	0.429871	1.53706	0.543613	-0.635592	1.49533	0.529622	4.46082	0.790766	0.429081	1.22068
DR3/DR3	0.585948	1.79669	0.324992	-0.0510241	1.22292	0.950256	3.3971	1.80296	0.0713941	3.80805
DR3/DR4	0.652293	1.91994	0.210706	0.239316	1.06527	1.27038	2.90162	3.09574	0.0019632	8.99258
DR4/DR4	0.0213678	1.0216	0.200198	-0.371013	0.413748	0.690035	1.51248	0.106734	0.915	0.128156
DR1/DR4	-1.34223	0.261262	0.611921	-2.54157	-0.142888	0.0787425	0.866851	-2.19347	0.0282734	5.14441
DR4/DR13	-0.592041	0.553197	0.73783	-2.03816	0.854078	0.130268	2.34921	-0.802409	0.422316	1.2436
SWE	0.241337	1.27295	0.122539	0.00116517	0.481508	1.00117	1.61851	1.96947	0.0488988	4.35406
FIN	0.0150945	1.01521	0.150814	-0.280495	0.310684	0.75541	1.36436	0.100087	0.920275	0.119863
GER	-0.442906	0.642168	0.268032	-0.968239	0.0824267	0.379751	1.08592	-1.65244	0.0984453	3.34453

## Sheet: Table F
Table F: Cox PH model output for GADA-first outcome using DR3 homozygote individuals.
Key:	log(HR): log2 of Hazard Ratio, HR: Hazard Ratio, SE(log(HR)): Standard Error, log(HR) lower 95%: Lower confidence interval for log(HR), log(HR) upper 95%: Upper confidence interval for log(HR), HR lower 95%: Lower confidence interval for HR, HR upper 95%: Upper confidence interval for HR, z: z-score of log(HR), p: p-value
covariate	log(HR)	HR	SE(log(HR))	log(HR) lower 95%	log(HR) upper 95%	HR lower 95%	HR upper 95%	z	p	-log2(p)
tri-SNP 101	-0.341013	0.71105	0.20798	-0.748646	0.0666204	0.473007	1.06889	-1.63964	0.101079	3.30644
FDR-T1D	1.04234	2.83585	0.277878	0.497711	1.58697	1.64495	4.88893	3.75107	0.000176079	12.4715
rs428595 (PPIL2)	0.203796	1.22605	0.512401	-0.800492	1.20808	0.449108	3.34707	0.397727	0.690831	0.533595
rs1004446 (INS)	-0.144843	0.865158	0.171421	-0.480821	0.191135	0.618275	1.21062	-0.844958	0.398134	1.32867
rs2476601 (PTPN22)	0.412584	1.51072	0.210085	0.000825778	0.824343	1.00083	2.28038	1.96389	0.0495423	4.3352
rs2292239 (ERBB3)	0.250519	1.28469	0.154823	-0.0529287	0.553966	0.948448	1.74014	1.6181	0.105641	3.24275
rs3184504 (SH2B3)	0.191149	1.21064	0.146604	-0.0961909	0.478488	0.908291	1.61363	1.30384	0.192289	2.37865
rs9934817 (RBFOX1)	-0.0186153	0.981557	0.591578	-1.17809	1.14086	0.307867	3.12945	-0.0314673	0.974897	0.0366785
rs11705721 (PXK/PDHB)	0.242152	1.27399	0.163043	-0.0774069	0.561711	0.925513	1.75367	1.4852	0.137491	2.8626
Male	0.193198	1.21312	0.224812	-0.247425	0.63382	0.780809	1.8848	0.859376	0.390133	1.35796
AMR	-0.430372	0.650267	0.622725	-1.65089	0.790147	0.191879	2.20372	-0.69111	0.489496	1.03063
AFR	0.206809	1.22975	0.809986	-1.38073	1.79435	0.251394	6.01558	0.255324	0.798473	0.324684
SWE	-0.0102941	0.989759	0.244607	-0.489715	0.469127	0.612801	1.5986	-0.0420843	0.966431	0.0492607
FIN	-0.800406	0.449147	0.441248	-1.66524	0.0644242	0.189146	1.06654	-1.81396	0.069684	3.84303
GER	-0.184045	0.831898	0.459233	-1.08413	0.716035	0.338197	2.0463	-0.400767	0.688592	0.538279

## Sheet: Table G
Table G: Cox PH model output for IAA-first outcome using all samples.
Key:	log(HR): log2 of Hazard Ratio, HR: Hazard Ratio, SE(log(HR)): Standard Error, log(HR) lower 95%: Lower confidence interval for log(HR), log(HR) upper 95%: Upper confidence interval for log(HR), HR lower 95%: Lower confidence interval for HR, HR upper 95%: Upper confidence interval for HR, z: z-score of log(HR), p: p-value
covariate	log(HR)	HR	SE(log(HR))	log(HR) lower 95%	log(HR) upper 95%	HR lower 95%	HR upper 95%	z	p	-log2(p)
tri-SNP 101	-0.448598	0.638523	0.179013	-0.799457	-0.0977389	0.449573	0.906886	-2.50595	0.0122122	6.35553
FDR-T1D	0.877254	2.40429	0.157814	0.567944	1.18656	1.76464	3.2758	5.55878	2.71661e-08	25.1336
rs428595 (PPIL2)	0.496569	1.64307	0.201286	0.102056	0.891082	1.10745	2.43776	2.46699	0.0136255	6.19754
rs1004446 (INS)	-0.244799	0.782862	0.087722	-0.416731	-0.0728675	0.659198	0.929724	-2.79063	0.00526059	7.57056
rs2476601 (PTPN22)	0.331617	1.39322	0.1069	0.122097	0.541138	1.12986	1.71796	3.10212	0.00192142	9.02361
rs2292239 (ERBB3)	0.143345	1.15413	0.078849	-0.011196	0.297886	0.988866	1.34701	1.81797	0.0690685	3.85583
rs3184504 (SH2B3)	0.225343	1.25275	0.0845572	0.0596138	0.391072	1.06143	1.47856	2.66498	0.0076994	7.02104
rs9934817 (RBFOX1)	0.0374265	1.03814	0.304563	-0.559506	0.634359	0.571491	1.88581	0.122886	0.902198	0.148485
rs11705721 (PXK/PDHB)	0.235208	1.26517	0.0816261	0.0752241	0.395192	1.07813	1.48467	2.88153	0.00395745	7.98121
Male	0.193542	1.21354	0.113819	-0.0295391	0.416624	0.970893	1.51683	1.70044	0.0890486	3.48926
AMR	-0.200609	0.818232	0.253673	-0.697798	0.29658	0.49768	1.34525	-0.790818	0.42905	1.22078
AFR	-0.621231	0.537283	0.985786	-2.55334	1.31087	0.0778217	3.70941	-0.630189	0.528571	0.91983
DR3/DR3	-0.173823	0.840446	0.383069	-0.924624	0.576978	0.39668	1.78065	-0.453764	0.649998	0.621492
DR3/DR4	0.43342	1.54252	0.21758	0.00697118	0.859869	1.007	2.36285	1.992	0.0463707	4.43064
DR4/DR4	-0.196372	0.821706	0.186844	-0.562579	0.169835	0.569738	1.18511	-1.051	0.293259	1.76975
DR1/DR4	-0.618514	0.538744	0.386176	-1.3754	0.138377	0.252737	1.14841	-1.60164	0.109236	3.19449
DR4/DR13	-0.0600945	0.941676	0.476702	-0.994413	0.874224	0.36994	2.39701	-0.126063	0.899682	0.152513
SWE	0.187861	1.20667	0.147519	-0.101271	0.476994	0.903688	1.61122	1.27347	0.202851	2.30151
FIN	0.56512	1.75966	0.153992	0.263301	0.866938	1.30122	2.37961	3.6698	0.000242738	12.0083
GER	-0.0891898	0.914672	0.255943	-0.590829	0.412449	0.553868	1.51051	-0.348475	0.727483	0.459014

## Sheet: Table H
Table H: Cox PH model output for IAA-first outcome using DR3 homozygote individuals.
Key:	log(HR): log2 of Hazard Ratio, HR: Hazard Ratio, SE(log(HR)): Standard Error, log(HR) lower 95%: Lower confidence interval for log(HR), log(HR) upper 95%: Upper confidence interval for log(HR), HR lower 95%: Lower confidence interval for HR, HR upper 95%: Upper confidence interval for HR, z: z-score of log(HR), p: p-value
covariate	log(HR)	HR	SE(log(HR))	log(HR) lower 95%	log(HR) upper 95%	HR lower 95%	HR upper 95%	z	p	-log2(p)
tri-SNP 101	-0.737999	0.47807	0.323184	-1.37143	-0.10457	0.253744	0.900712	-2.28352	0.0223995	5.48039
FDR-T1D	0.663616	1.9418	0.577783	-0.468818	1.79605	0.625742	6.0258	1.14856	0.250739	1.99574
rs1004446 (INS)	-0.354481	0.701538	0.290855	-0.924547	0.215585	0.396711	1.24059	-1.21875	0.222938	2.16529
rs2292239 (ERBB3)	0.46235	1.5878	0.257758	-0.042846	0.967545	0.958059	2.63148	1.79374	0.072855	3.77883
rs3184504 (SH2B3)	0.388462	1.47471	0.277171	-0.154784	0.931708	0.856601	2.53884	1.40152	0.161057	2.63435
rs11705721 (PXK/PDHB)	0.375035	1.45504	0.244194	-0.103576	0.853646	0.901607	2.34819	1.53581	0.124585	3.00479
Male	-0.56619	0.567684	0.389101	-1.32881	0.196433	0.264791	1.21705	-1.45512	0.145635	2.77957
AMR	-0.56045	0.570952	1.0015	-2.52336	1.40246	0.08019	4.06517	-0.55961	0.575745	0.796497
SWE	0.621905	1.86247	0.441691	-0.243793	1.4876	0.78365	4.42647	1.40801	0.159128	2.65174
FIN	0.824409	2.28053	0.575195	-0.302953	1.95177	0.738634	7.04114	1.43327	0.151781	2.71994
GER	-0.383485	0.681482	1.0683	-2.47731	1.71034	0.0839689	5.53084	-0.358968	0.719619	0.474695

## Sheet: Table I
Table I: Cox PH model output for CD outcome using all samples.
Key:	log(HR): log2 of Hazard Ratio, HR: Hazard Ratio, SE(log(HR)): Standard Error, log(HR) lower 95%: Lower confidence interval for log(HR), log(HR) upper 95%: Upper confidence interval for log(HR), HR lower 95%: Lower confidence interval for HR, HR upper 95%: Upper confidence interval for HR, z: z-score of log(HR), p: p-value
covariate	log(HR)	HR	SE(log(HR))	log(HR) lower 95%	log(HR) upper 95%	HR lower 95%	HR upper 95%	z	p	-log2(p)
tri-SNP 101	0.275119	1.31669	0.112311	0.0549936	0.495245	1.05653	1.6409	2.44962	0.0143008	6.12776
FDR-CD	1.24507	3.47316	0.112322	1.02492	1.46521	2.78687	4.32846	11.0848	1.48635e-28	92.4422
gluten_intake	0.0973708	1.10227	0.0291057	0.0403246	0.154417	1.04115	1.16698	3.34542	0.000821586	10.2493
rs4851575 (IL18R1, IL18RAP)	0.174993	1.19124	0.0690583	0.0396406	0.310344	1.04044	1.36389	2.53398	0.0112775	6.47041
rs114569351 (PLEK,FBXO48)	0.683661	1.98112	0.213384	0.265435	1.10189	1.304	3.00984	3.20389	0.00135582	9.52661
rs12493471 (CCR9,LZTFL1,CXCR6)	0.241173	1.27274	0.0577267	0.12803	0.354315	1.13659	1.4252	4.17783	2.94297e-05	15.0524
rs1054091 (RSPH3,TAGAP)	0.26805	1.30741	0.0753027	0.12046	0.415641	1.12802	1.51534	3.55964	0.000371364	11.3949
rs72704176 (ASH1L)	0.398438	1.4895	0.167195	0.0707416	0.726135	1.0733	2.06708	2.38307	0.0171689	5.86406
rs3771689 (BAZ2B)	-0.295996	0.74379	0.0900977	-0.472584	-0.119408	0.623389	0.887446	-3.28528	0.0010188	9.93892
rs13014907 (ZNF804A)	0.415029	1.51442	0.202183	0.0187586	0.8113	1.01894	2.25083	2.05274	0.0400974	4.64035
rs11739460 (TCOF1)	0.121345	1.12901	0.0574759	0.008694	0.233995	1.00873	1.26364	2.11123	0.0347528	4.84673
rs77532435 (GRB10)	0.413247	1.51172	0.14344	0.132109	0.694385	1.14123	2.00248	2.88097	0.00396454	7.97863
rs6967298 (AUTS2)	-0.209586	0.81092	0.0817092	-0.369733	-0.0494384	0.690919	0.951764	-2.56502	0.0103171	6.59882
rs61751041 (LAMB1)	0.332552	1.39452	0.173723	-0.00793816	0.673042	0.992093	1.96019	1.91427	0.0555857	4.16914
rs2409747 (XKR6)	0.208206	1.23147	0.0834108	0.0447242	0.371689	1.04574	1.45018	2.49616	0.0125547	6.31562
Male	-0.585375	0.556897	0.0870675	-0.756024	-0.414726	0.469529	0.660521	-6.72323	1.77737e-11	35.7115
AMR	-0.479686	0.618978	0.238223	-0.946595	-0.0127762	0.38806	0.987305	-2.0136	0.0440521	4.50465
AFR	-1.15605	0.314727	1.02493	-3.16487	0.852773	0.0422196	2.34614	-1.12793	0.259349	1.94704
DR3/DR3	2.43473	11.4128	0.359113	1.73089	3.13858	5.64566	23.0711	6.77987	1.20287e-11	36.2747
DR3/DR4	1.5979	4.94264	0.316645	0.977286	2.21851	2.65723	9.19364	5.04634	4.50357e-07	21.0824
DR4/DR4	1.66198	5.26973	0.312051	1.05037	2.27359	2.85871	9.71418	5.32599	1.00406e-07	23.2477
DR1/DR4	0.832738	2.29961	0.589455	-0.322573	1.98805	0.724283	7.30128	1.41273	0.157737	2.66441
DR4/DR13	1.60402	4.97299	0.618312	0.392152	2.81589	1.48016	16.7081	2.59419	0.00948129	6.7207
SWE	0.139904	1.15016	0.101451	-0.0589362	0.338744	0.942767	1.40318	1.37903	0.167885	2.57445
FIN	-0.0997812	0.905035	0.124051	-0.342917	0.143354	0.709697	1.15414	-0.804356	0.421191	1.24745
GER	-0.326718	0.721287	0.221562	-0.760972	0.107537	0.467212	1.11353	-1.47461	0.140318	2.83323

## Sheet: Table J
Table J: Cox PH model output for CD outcome using DR3 homozygote individuals.
Key:	log(HR): log2 of Hazard Ratio, HR: Hazard Ratio, SE(log(HR)): Standard Error, log(HR) lower 95%: Lower confidence interval for log(HR), log(HR) upper 95%: Upper confidence interval for log(HR), HR lower 95%: Lower confidence interval for HR, HR upper 95%: Upper confidence interval for HR, z: z-score of log(HR), p: p-value
covariate	log(HR)	HR	SE(log(HR))	log(HR) lower 95%	log(HR) upper 95%	HR lower 95%	HR upper 95%	z	p	-log2(p)
tri-SNP 101	0.275317	1.31695	0.131553	0.0174776	0.533156	1.01763	1.7043	2.09282	0.0363652	4.7813
FDR-CD	1.03684	2.82029	0.15352	0.735946	1.33773	2.08746	3.81039	6.75379	1.44035e-11	36.0148
gluten_intake	0.115445	1.12237	0.045186	0.026882	0.204008	1.02725	1.22631	2.55488	0.0106224	6.55675
rs4851575 (IL18R1, IL18RAP)	0.247817	1.28122	0.0993786	0.0530381	0.442595	1.05447	1.55674	2.49366	0.0126433	6.30548
rs114569351 (PLEK,FBXO48)	0.078369	1.08152	0.413259	-0.731605	0.888343	0.481136	2.4311	0.189636	0.849594	0.235154
rs12493471 (CCR9,LZTFL1,CXCR6)	0.311854	1.36596	0.0838755	0.147461	0.476247	1.15889	1.61002	3.71806	0.000200758	12.2823
rs1054091 (RSPH3,TAGAP)	0.111123	1.11753	0.117559	-0.119287	0.341534	0.887553	1.4071	0.945258	0.344527	1.53731
rs72704176 (ASH1L)	0.428703	1.53526	0.239503	-0.0407147	0.89812	0.960103	2.45498	1.78997	0.0734592	3.76691
rs3771689 (BAZ2B)	-0.340932	0.711107	0.130411	-0.596533	-0.0853315	0.550718	0.918208	-2.61429	0.00894127	6.80531
rs13014907 (ZNF804A)	0.651503	1.91842	0.265598	0.130941	1.17207	1.1399	3.22865	2.45297	0.0141683	6.14119
rs11739460 (TCOF1)	0.1084	1.11449	0.0849215	-0.0580428	0.274843	0.94361	1.31632	1.27648	0.201787	2.30909
rs77532435 (GRB10)	0.311899	1.36602	0.199366	-0.0788517	0.70265	0.924177	2.0191	1.56445	0.117711	3.08668
rs6967298 (AUTS2)	-0.31628	0.728855	0.127386	-0.565951	-0.0666093	0.56782	0.935561	-2.48286	0.0130333	6.26166
rs61751041 (LAMB1)	0.554534	1.74113	0.242143	0.0799428	1.02913	1.08323	2.79862	2.29011	0.0220149	5.50538
rs2409747 (XKR6)	0.238796	1.26972	0.121619	0.000425887	0.477165	1.00043	1.6115	1.96347	0.0495921	4.33375
Male	-0.697263	0.497946	0.122726	-0.937801	-0.456725	0.391488	0.633354	-5.68147	1.33539e-08	26.1582
AMR	-0.590371	0.554122	0.420196	-1.41394	0.233199	0.243183	1.26263	-1.40499	0.160025	2.64363
AFR	-0.456062	0.633774	1.07238	-2.55788	1.64576	0.0774686	5.18494	-0.425282	0.670631	0.576408
SWE	0.160279	1.17384	0.145656	-0.125201	0.44576	0.882319	1.56168	1.1004	0.271159	1.88279
FIN	0.0586029	1.06035	0.168211	-0.271085	0.38829	0.762552	1.47446	0.348389	0.727548	0.458886
GER	-0.26841	0.764594	0.333115	-0.921304	0.384484	0.398	1.46886	-0.805758	0.420382	1.25023

[truncated: 7 more sheets: Table K, Table L, Table M, Table N, Table O, Table P, Table Q]
